# Supplementary material
Source: PubMed Central journal article supplement (PMC5675490)
Supplement: mmc1.pdf [file mmc1.pdf]

**YMTHE, Volume 25**

## **Supplemental Information**

**Function of Novel Anti-CD19 Chimeric Antigen**

**Receptors with Human Variable Regions Is**

**Affected by Hinge and Transmembrane Domains**

**Leah Alabanza, Melissa Pegues, Claudia Geldres, Victoria Shi, Jed J.W. Wiltzius, Stuart A. Sievers, Shicheng Yang, and James N. Kochenderfer**

## Supplemental Figure 1

**A**

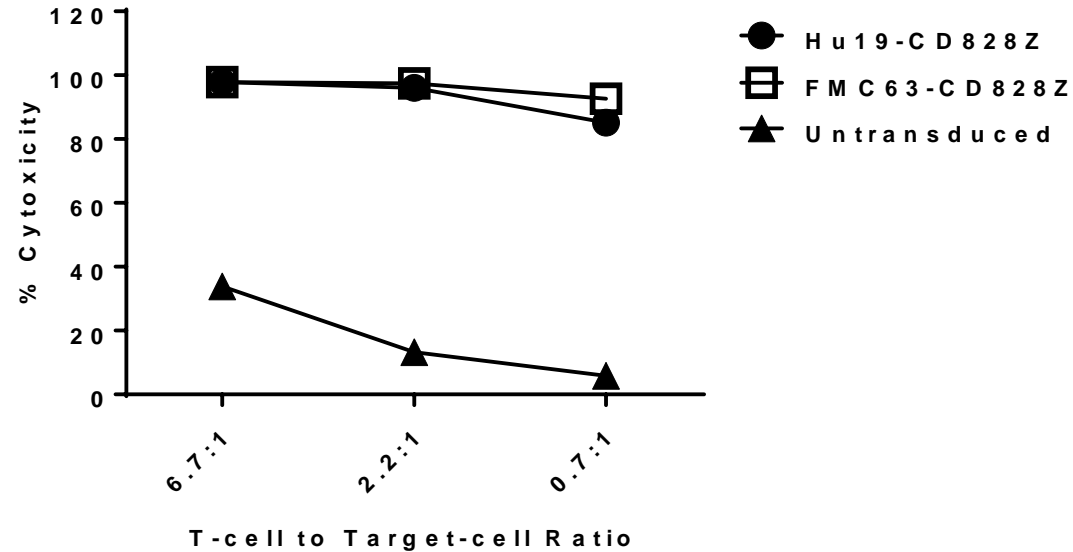

**B**

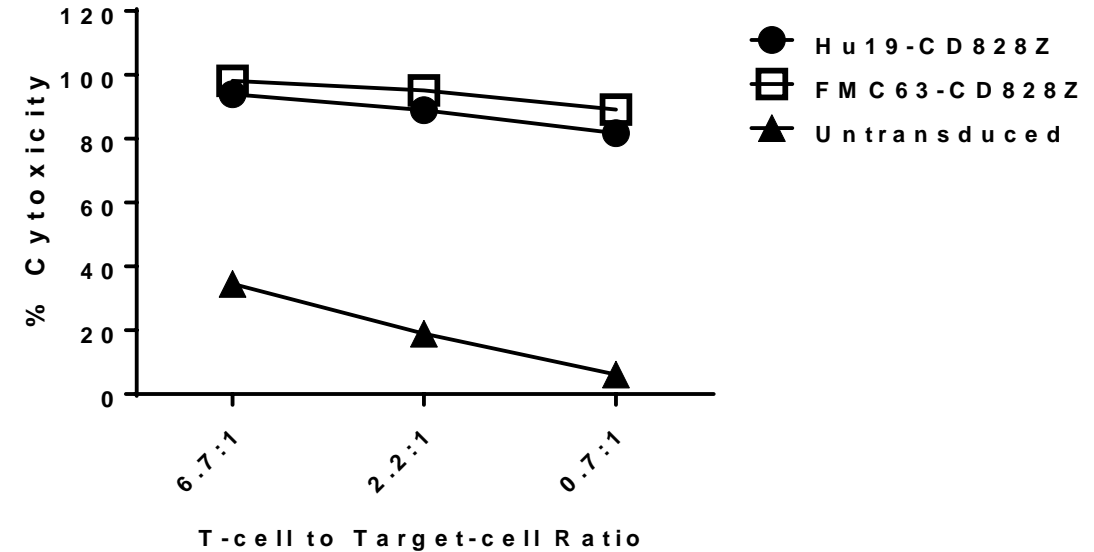

T cells from the same patient were transduced with either Hu19-CD828Z or FMC63-CD828Z. These T cells were tested in 4 hour cytotoxicity assays. T cells were cultured at the indicated T cell to target cell ratios with either NALM6 (A) or Toledo (B) target cells. The mean and standard error of the mean cytotoxicity are shown. No substantial difference in cytotoxicity between the 2 CARs was detected.

## Supplemental Figure 2: in vivo comparison of FMC63-CD828Z and Hu19-CD828Z

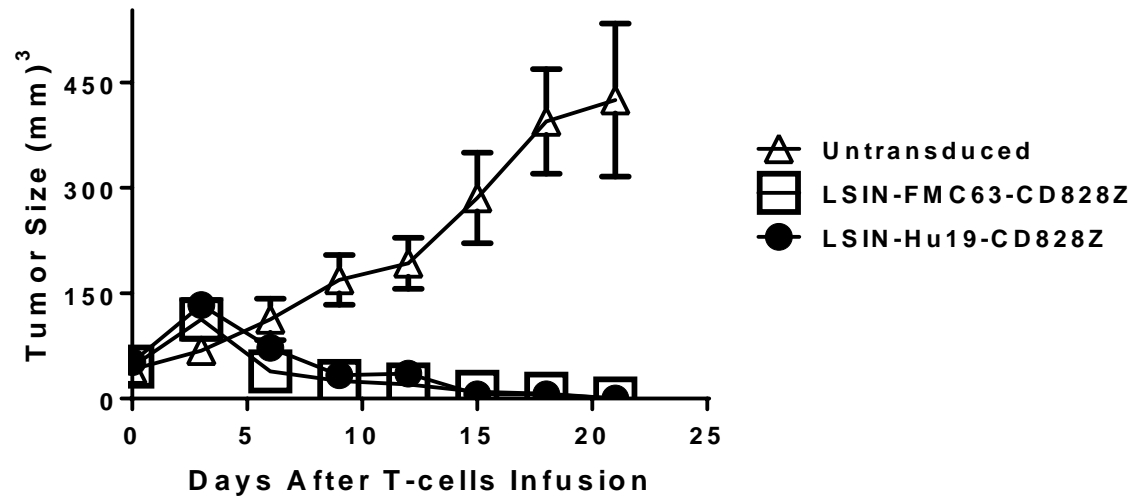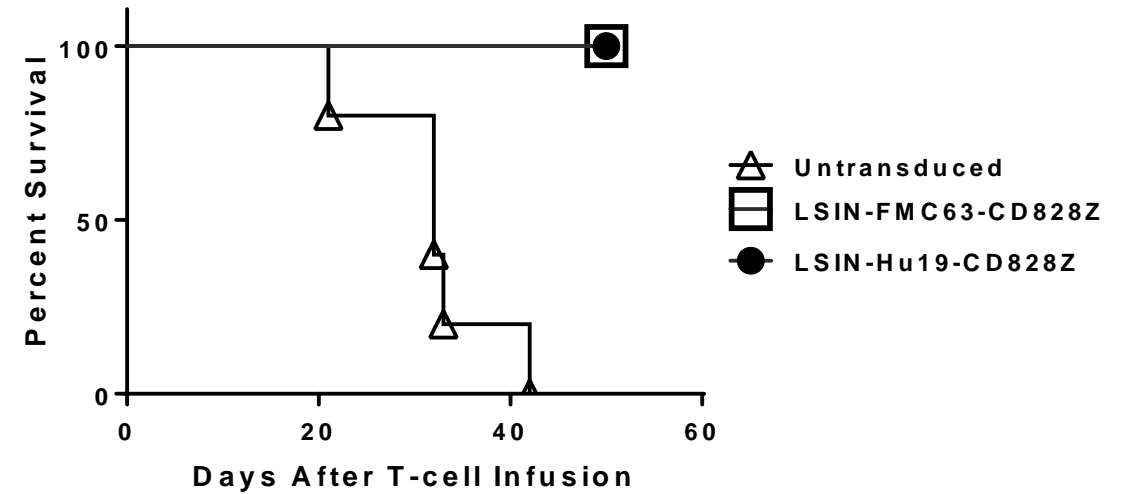

NALM6 tumors were established in immunocompromised NSG mice. The mice then received infusions of 8 million T cells transduced with LSIN-FMC63-CD828Z or LSIN-Hu19-CD828Z or Untransduced T cells. Tumors were measured every 3 days in a blinded manner. There were 5 mice in each group. The tumor sizes and the survival of the mice are shown.

## Supplemental Table 1: Raw IFN-gamma ELISA data from Figure 2

|                            | <b>Nalm-6</b> | <b>NGFR-K562</b> | <b>CAR %</b> |
|----------------------------|---------------|------------------|--------------|
| <b>Patient 1 Hu19-28z</b>  | <b>12368</b>  | <b>111</b>       | <b>65</b>    |
| <b>Patient 1 Hu19-828z</b> | <b>3285</b>   | <b>151</b>       | <b>77</b>    |
|                            |               |                  |              |
| <b>Patient 2 Hu19-28z</b>  | <b>11589</b>  | <b>44</b>        | <b>55</b>    |
| <b>Patient 2 Hu19-828z</b> | <b>3617</b>   | <b>123</b>       | <b>74</b>    |
|                            |               |                  |              |
| <b>Patient 3 Hu19-28z</b>  | <b>7047</b>   | <b>29</b>        | <b>57</b>    |
| <b>Patient 3 Hu19-828z</b> | <b>2665</b>   | <b>68</b>        | <b>64</b>    |
|                            |               |                  |              |
| <b>Patient 4 Hu19-28z</b>  | <b>3637</b>   | <b>25</b>        | <b>66</b>    |
| <b>Patient 4 Hu19-828z</b> | <b>1728</b>   | <b>36</b>        | <b>75</b>    |
|                            |               |                  |              |
| <b>Patient 5 Hu19-28z</b>  | <b>12770</b>  | <b>189</b>       | <b>39</b>    |
| <b>Patient 5 Hu19-828z</b> | <b>5469</b>   | <b>203</b>       | <b>45</b>    |

Cultured T cells from the indicated patients were transduced with the indicated CARs and cultured overnight with the indicated target cells. After the overnight incubation, a standard ELISA assay was performed on the culture supernatant. NALM6 is CD19<sup>+</sup> and NGFR-K562 is CD19-negative. The percentage of the T cells expressing the indicated CAR is given as the CAR %. All values are in pg/mL. The normalized version of these results is in Figure 2G.

## Supplemental Table 2: Raw TNF $\alpha$ ELISA data from Figure 2

|                            | <b>Nalm-6</b> | <b>NGFR-K562</b> | <b>CAR %</b> |
|----------------------------|---------------|------------------|--------------|
| <b>Patient 1 Hu19-28z</b>  | <b>1558</b>   | <b>&lt;40</b>    | <b>65</b>    |
| <b>Patient 1 Hu19-828z</b> | <b>530</b>    | <b>&lt;40</b>    | <b>77</b>    |
| <b>Patient 2 Hu19-28z</b>  | <b>1663</b>   | <b>&lt;40</b>    | <b>55</b>    |
| <b>Patient 2 Hu19-828z</b> | <b>894</b>    | <b>&lt;40</b>    | <b>74</b>    |
| <b>Patient 3 Hu19-28z</b>  | <b>2224</b>   | <b>0</b>         | <b>57</b>    |
| <b>Patient 3 Hu19-828z</b> | <b>840</b>    | <b>0</b>         | <b>64</b>    |
| <b>Patient 4 Hu19-28z</b>  | <b>1797</b>   | <b>25</b>        | <b>66</b>    |
| <b>Patient 4 Hu19-828z</b> | <b>771</b>    | <b>19</b>        | <b>75</b>    |
| <b>Patient 5 Hu19-28z</b>  | <b>1988</b>   | <b>35</b>        | <b>39</b>    |
| <b>Patient 5 Hu19-828z</b> | <b>950</b>    | <b>35</b>        | <b>45</b>    |

Cultured T cells from the indicated patients were transduced with the indicated CARs and cultured overnight with the indicated target cells. After the overnight incubation, a standard ELISA assay was performed on the culture supernatant. NALM6 is CD19<sup>+</sup> and NGFR-K562 is CD19-negative. All values are in pg/mL. The percentage of the T cells expressing the indicated CAR is given as the CAR %. The normalized version of these results is in Figure 2H.

### Supplemental Table 3: Raw IFN-gamma ELISA data from Figure 3

| IFN-gamma            | CD19-K562 | NGFR-K562 | CAR % |
|----------------------|-----------|-----------|-------|
| Patient 1 FMC63-28z  | 81568     | 202       | 75    |
| Patient 1 FMC63-828z | 29983     | 133       | 89    |
| Patient 2 FMC63-28z  | 69146     | 170       | 79    |
| Patient 2 FMC63-828z | 21771     | 144       | 93    |
| Patient 3 FMC63-28z  | 74756     | 462       | 73    |
| Patient 3 FMC63-828z | 36054     | 155       | 73    |
| Patient 4 FMC63-28z  | 57845     | 985       | 84    |
| Patient 4 FMC63-828z | 19888     | 254       | 93    |
| Patient 5 FMC63-28z  | 20694     | 282       | 71    |
| Patient 5 FMC63-828z | 8795      | 72        | 87    |

Cultured T cells from the indicated patients were transduced with the indicated CARs and cultured overnight with the indicated target cells. After the overnight incubation, a standard ELISA assay was performed on the culture supernatant. CD19-K562 is CD19<sup>+</sup> and NGFR-K562 is CD19-negative. All values are in pg/mL. The percentage of the T cells expressing the indicated CAR is given as the CAR %. The normalized version of these results is in Figure 3E.

## Supplemental Table 4: Raw TNF- $\alpha$ ELISA data from Figure 3

|                             | <b>CD19-K562</b> | <b>NGFR-K562</b> | <b>CAR %</b> |
|-----------------------------|------------------|------------------|--------------|
| <b>Patient 1 FMC63-28z</b>  | <b>9671</b>      | <b>60</b>        | <b>75</b>    |
| <b>Patient 1 FMC63-828z</b> | <b>5510</b>      | <b>36</b>        | <b>89</b>    |
| <b>Patient 2 FMC63-28z</b>  | <b>2732</b>      | <b>21</b>        | <b>79</b>    |
| <b>Patient 2 FMC63-828z</b> | <b>1552</b>      | <b>16</b>        | <b>93</b>    |
| <b>Patient 3 FMC63-28z</b>  | <b>6243</b>      | <b>89</b>        | <b>73</b>    |
| <b>Patient 3 FMC63-828z</b> | <b>2354</b>      | <b>32</b>        | <b>73</b>    |
| <b>Patient 4 FMC63-28z</b>  | <b>9865</b>      | <b>100</b>       | <b>84</b>    |
| <b>Patient 4 FMC63-828z</b> | <b>3238</b>      | <b>&lt;40</b>    | <b>93</b>    |
| <b>Patient 5 FMC63-28z</b>  | <b>15518</b>     | <b>671</b>       | <b>71</b>    |
| <b>Patient 5 FMC63-828z</b> | <b>7462</b>      | <b>53</b>        | <b>87</b>    |

Cultured T cells from the indicated patients were transduced with the indicated CARs and cultured overnight with the indicated target cells. After the overnight incubation, a standard ELISA assay was performed on the culture supernatant. CD19-K562 is CD19<sup>+</sup> and NGFR-K562 is CD19-negative. All values are in pg/mL. The percentage of the T cells expressing the indicated CAR is given as the CAR %. The normalized version of these results is in Figure 3F.

## Supplemental Table 5: Raw IL-2 ELISA data from Figure 4

|                            | <b>Nalm-6</b> | <b>NGFR-K562</b> | <b>CAR %</b> |
|----------------------------|---------------|------------------|--------------|
| <b>Patient 1 Hu19-28z</b>  | <b>373</b>    | <b>12</b>        | <b>62</b>    |
| <b>Patient 1 Hu19-828z</b> | <b>15</b>     | <b>12</b>        | <b>74</b>    |
|                            |               |                  |              |
| <b>Patient 2 Hu19-28z</b>  | <b>1226</b>   | <b>17</b>        | <b>34</b>    |
| <b>Patient 2 Hu19-828z</b> | <b>268</b>    | <b>20</b>        | <b>46</b>    |
|                            |               |                  |              |
| <b>Patient 3 Hu19-28z</b>  | <b>197</b>    | <b>20</b>        | <b>68</b>    |
| <b>Patient 3 Hu19-828z</b> | <b>44</b>     | <b>22</b>        | <b>80</b>    |
|                            |               |                  |              |
| <b>Patient 4 Hu19-28z</b>  | <b>886</b>    | <b>126</b>       | <b>60</b>    |
| <b>Patient 4 Hu19-828z</b> | <b>714</b>    | <b>147</b>       | <b>75</b>    |
|                            |               |                  |              |
| <b>Patient 5 Hu19-28z</b>  | <b>1024</b>   | <b>68</b>        | <b>46</b>    |
| <b>Patient 5 Hu19-828z</b> | <b>302</b>    | <b>40</b>        | <b>50</b>    |
|                            |               |                  |              |
| <b>Patient 6 Hu19-28z</b>  | <b>1404</b>   | <b>16</b>        | <b>57</b>    |
| <b>Patient 6 Hu19-828z</b> | <b>81</b>     | <b>16</b>        | <b>64</b>    |

Cultured T cells from the indicated patients were transduced with the indicated CARs and cultured overnight with the indicated target cells. After the overnight incubation, a standard ELISA assay was performed on the culture supernatant. NALM6 is CD19<sup>+</sup> and NGFR-K562 is CD19-negative. All values are in pg/mL. The percentage of the T cells expressing the indicated CAR is given as the CAR %. The normalized version of these results is in Figure 4E.



**Supplemental Table 6: absolute values of median fluorescent intensity of phosphorylated tyrosine-142 in CD3 $\zeta$  ITAMs of CAR T cells**

| <b>Patient</b> | <b>Hu19-CD828Z<br/>plus NALM6</b> | <b>Hu19-CD828Z<br/>plus NGFR-K562</b> | <b>Hu19-28Z<br/>plus NALM6</b> | <b>Hu19-28Z<br/>plus NGFR-K562</b> |
|----------------|-----------------------------------|---------------------------------------|--------------------------------|------------------------------------|
| 1              | 270                               | 245                                   | 211                            | 140                                |
| 2              | 294                               | 211                                   | 235                            | 158                                |
| 3              | 348                               | 299                                   | 267                            | 190                                |
| 4              | 376                               | 347                                   | 268                            | 186                                |

All numbers are median fluorescent intensity.

T cells expressing the indicated CARs were cultured with the indicated target cells.

## Supplemental Figure 3: Comparison of AICD with Hu19 versus FMC63 scFvs

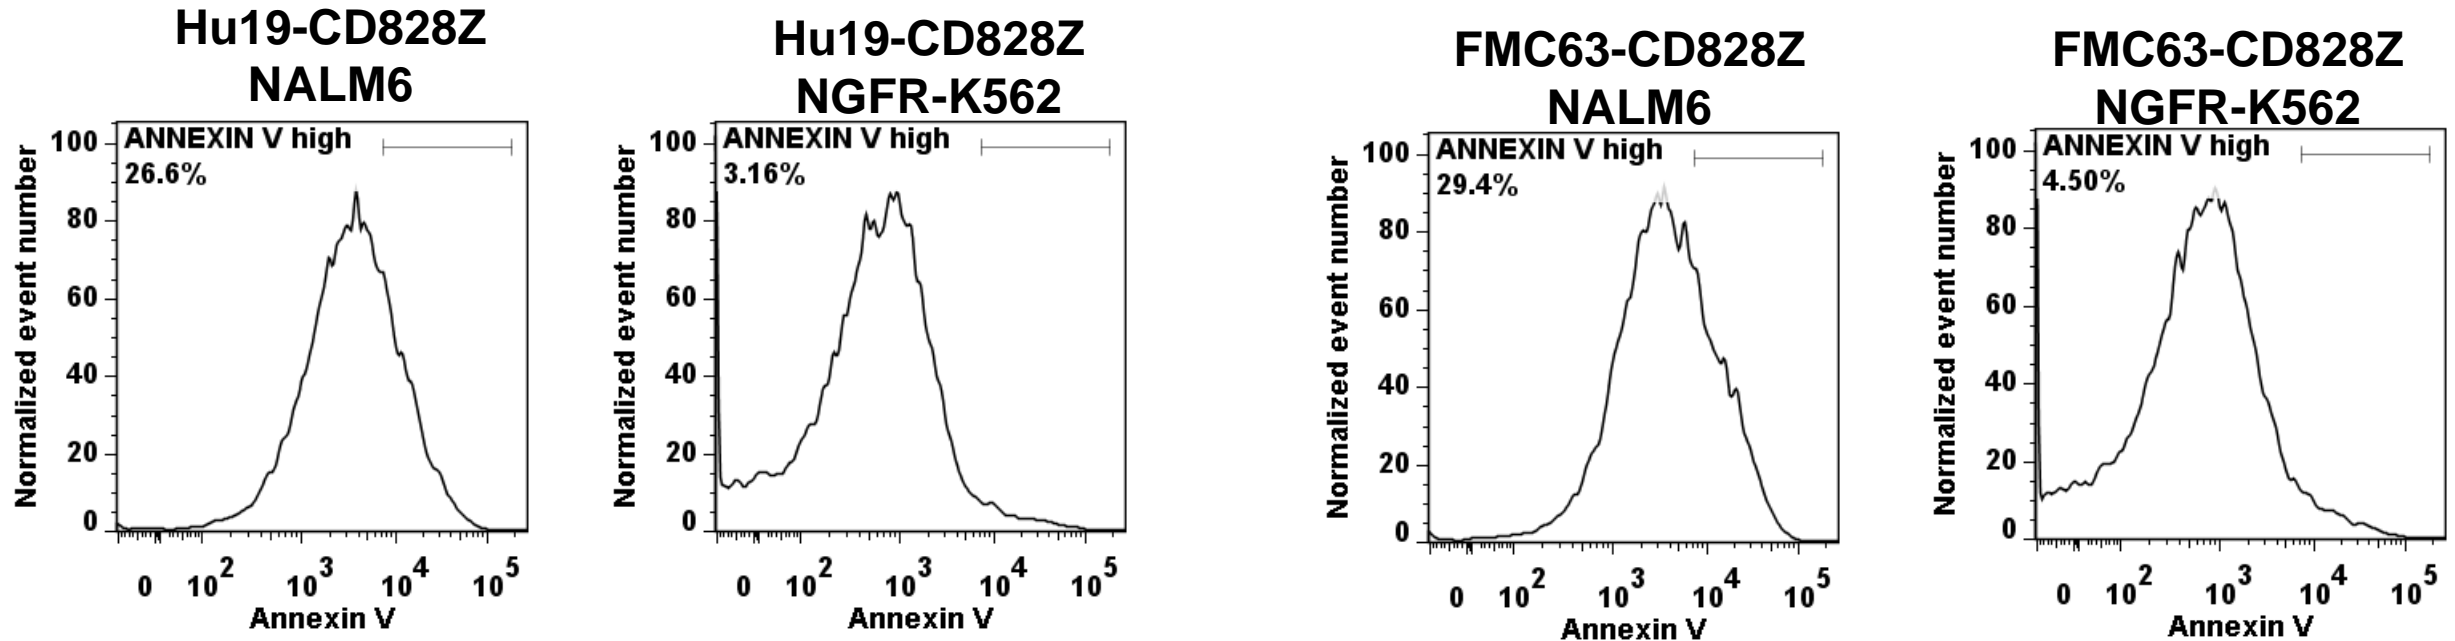

**Levels of activation-induced cell death (AICD) were similar in T cells expressing either Hu19-CD828Z or FMC63-CD828Z.** T cells from the same donor that were transduced with either Hu19-CD828Z or FMC63-CD828Z were cultured with either CD19<sup>+</sup> NALM6 cells or CD19-negative NGFR-K562 cells. In the figure, the CAR that T cells were transduced with is on the top line of the label and the target cell is on the bottom line of the label. This is a representative example of 2 different experiments with cells from different donors.

## Supplemental Figure 4: memory markers at day 7 after culture initiation

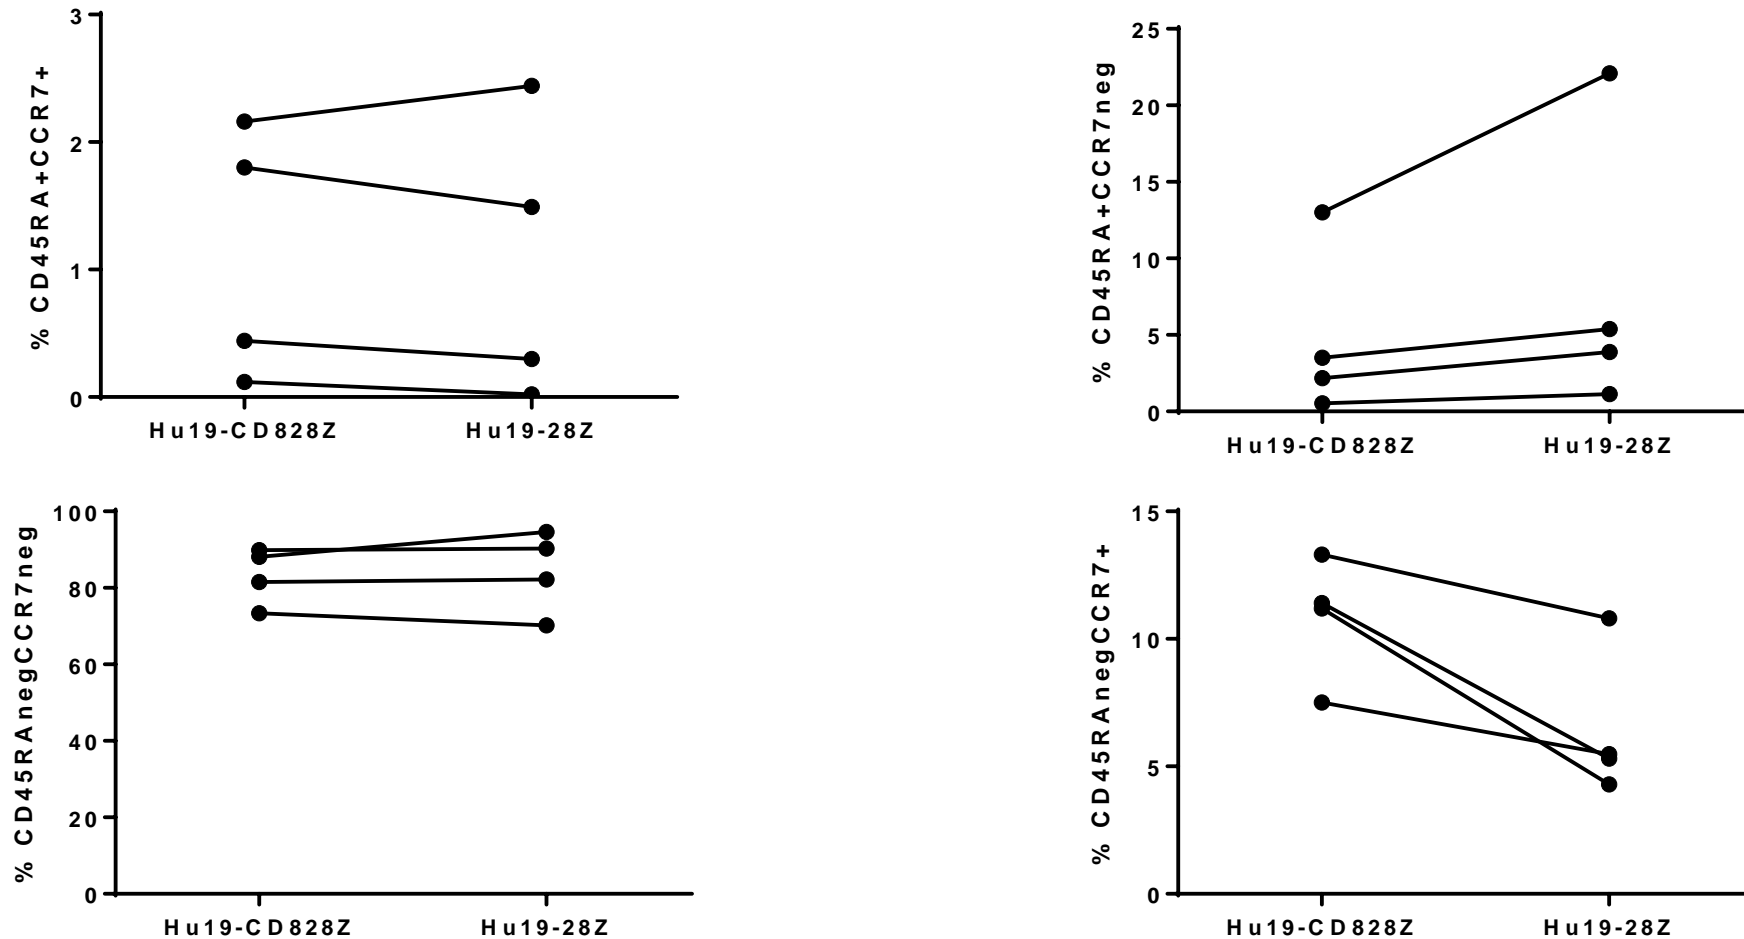

PBMC from 4 patients were activated with an anti-CD3 antibody and transduced with either Hu19-CD828Z or Hu19-28Z. On day 7 after culture initiation, the cells were stained for the indicated markers. Plots of CCR7 versus CD45RA gated on live, CD3<sup>+</sup>, CAR<sup>+</sup> lymphocytes were analyzed. There was a statistically-significant difference between Hu19-CD828Z and Hu19-28Z only for the %CD45RA-negative, CCR7<sup>+</sup> central memory T cells (P=0.039, paired two-tailed t test).

## Supplemental Figure 5A: Activation and exhaustion markers at day 7 after culture initiation

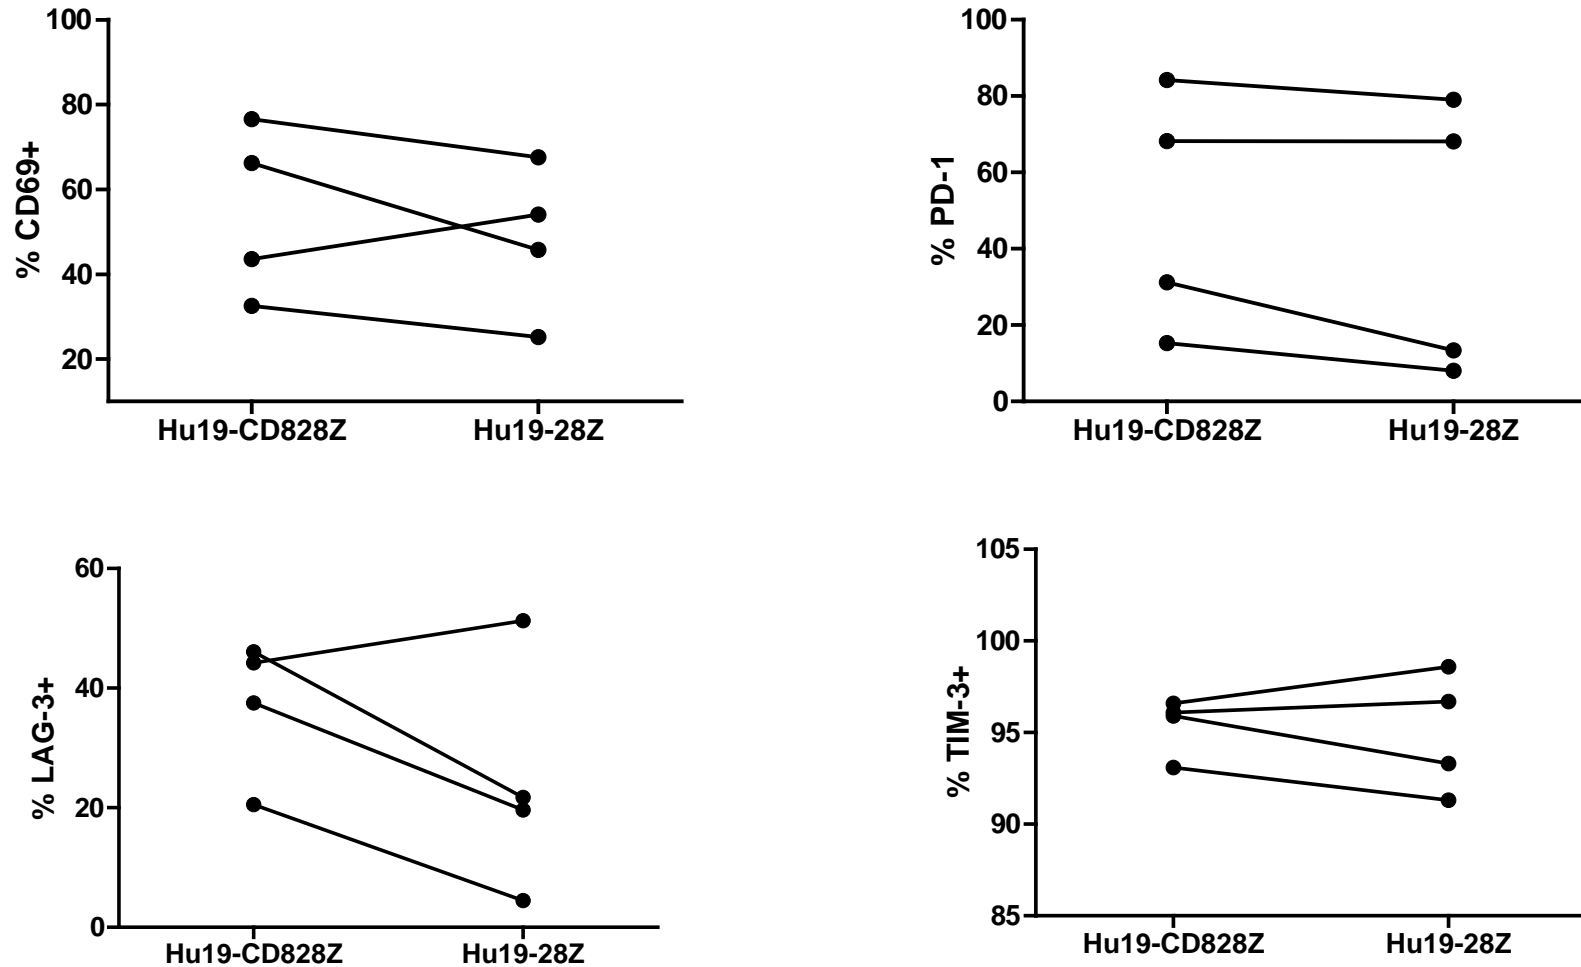

PBMC from 4 patients were activated with an anti-CD3 antibody and transduced with either Hu19-CD828Z or Hu19-28Z. On day 7 after culture initiation, the cells were stained for the indicated markers. Plots are gated on live, CD3<sup>+</sup>, CAR<sup>+</sup> lymphocytes. There was not a statistically-significant difference between Hu19-CD828Z and Hu19-28Z for CD69, PD-1, LAG-3, or TIM-3.

## Supplemental Figure 5B: Activation and exhaustion markers at day 7 after culture initiation

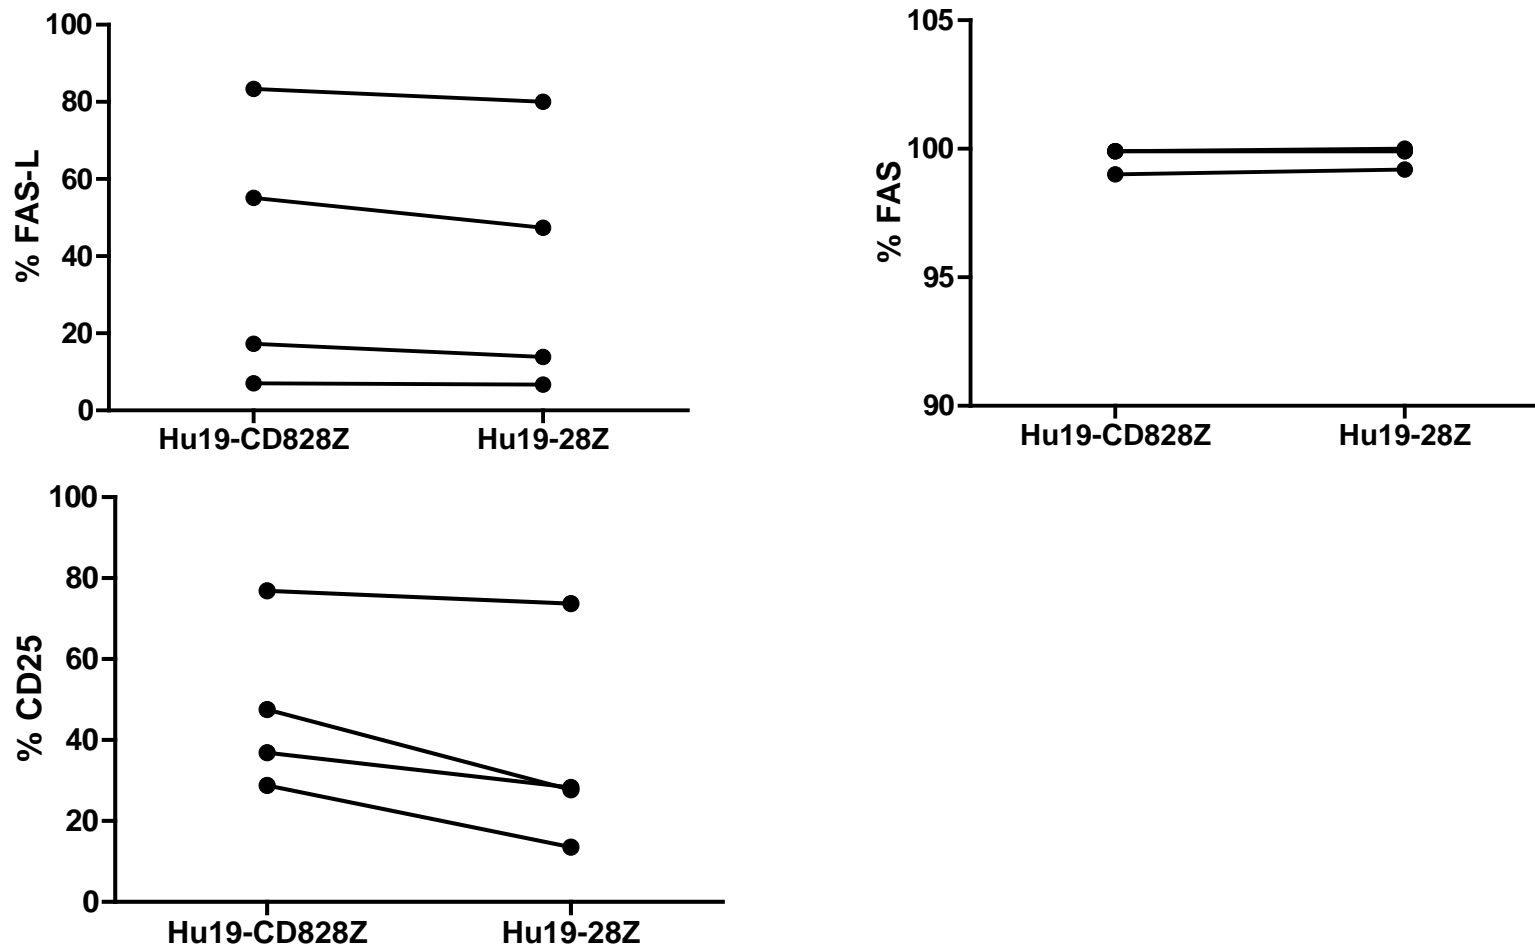

PBMC from 4 patients were activated with an anti-CD3 antibody and transduced with either Hu19-CD828Z or Hu19-28Z. On day 7 after culture initiation, the cells were stained for the indicated markers. Plots are gated on live, CD3<sup>+</sup>, CAR<sup>+</sup> lymphocytes. There was not a statistically-significant difference between Hu19-CD828Z and Hu19-28Z for FAS-L or FAS expression. CD25 expression was slightly lower on Hu19-28Z T cells (P=0.049, paired 2-tailed t test).

## Supplemental Figure 6

### Fas ligand

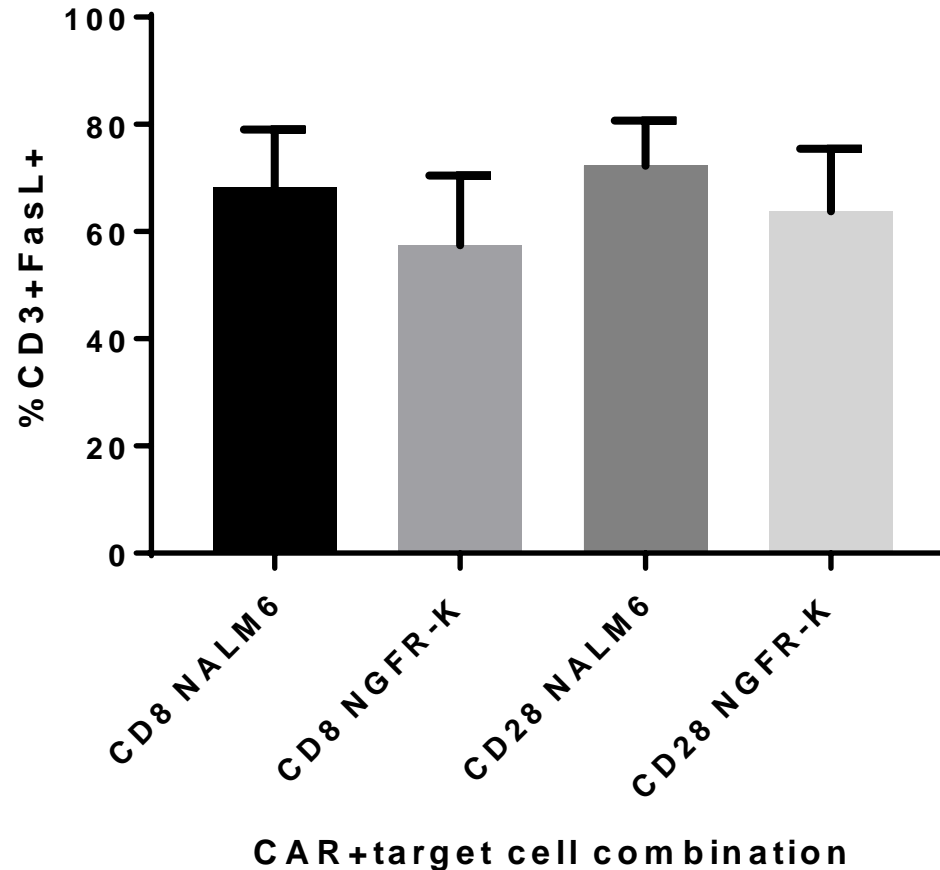

T cells from 4 patients were transduced with either Hu19-CD828Z (CD8 on x-axis label) or Hu19-28Z (28 on x-axis label). The T cells were stimulated with irradiated CD19-K562 cells on day 7 and day 10 after initiation of the cultures. On day 12 after culture initiation, the T cells were cultured overnight with either CD19<sup>+</sup> NALM6 cells (NALM6 on x-axis label) or CD19-negative NGFR-K562 cells (NGFR-K on x-axis label). FasL (Fas ligand) staining was conducted. The mean (+ standard error of mean) percentage of CD3<sup>+</sup> CAR<sup>+</sup> cells that expressed FasL is shown. There was not a statistically significant difference between the different groups.

## Supplemental Figure 7

### T cells expressing FMC63-28Z underwent activation-induced cell death in vitro

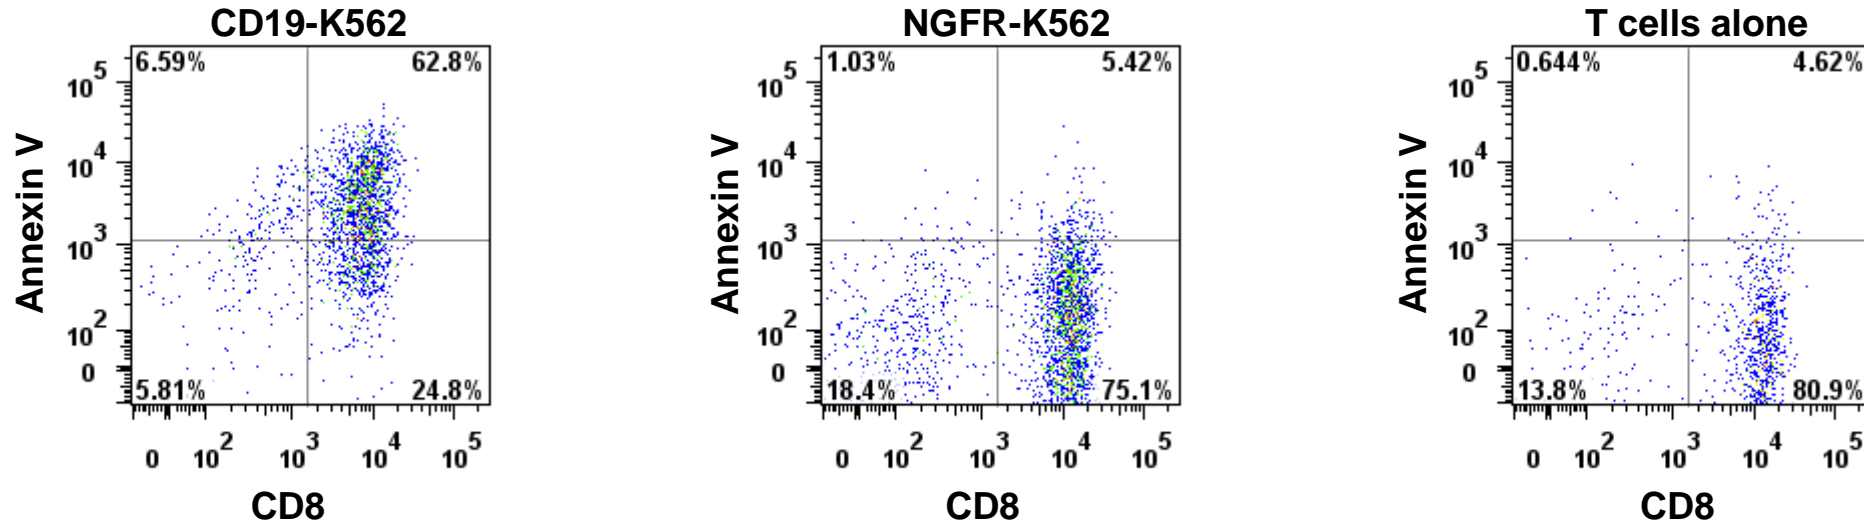

T cells expressing FMC63-28Z were cultured overnight with CD19<sup>+</sup> CD19-K562 cells or CD19-negative NGFR-K562 cells. CAR T cells were also cultured alone. At the end of the culture period, cells were stained with annexin V to detect apoptotic cells. Plots are gated on live CD3<sup>+</sup>, CAR<sup>+</sup> cells. CAR T cells were detected by anti-Fab staining. The percentage of CAR<sup>+</sup> cells undergoing apoptosis increased in a CD19-specific manner.

## Supplemental Figure 8

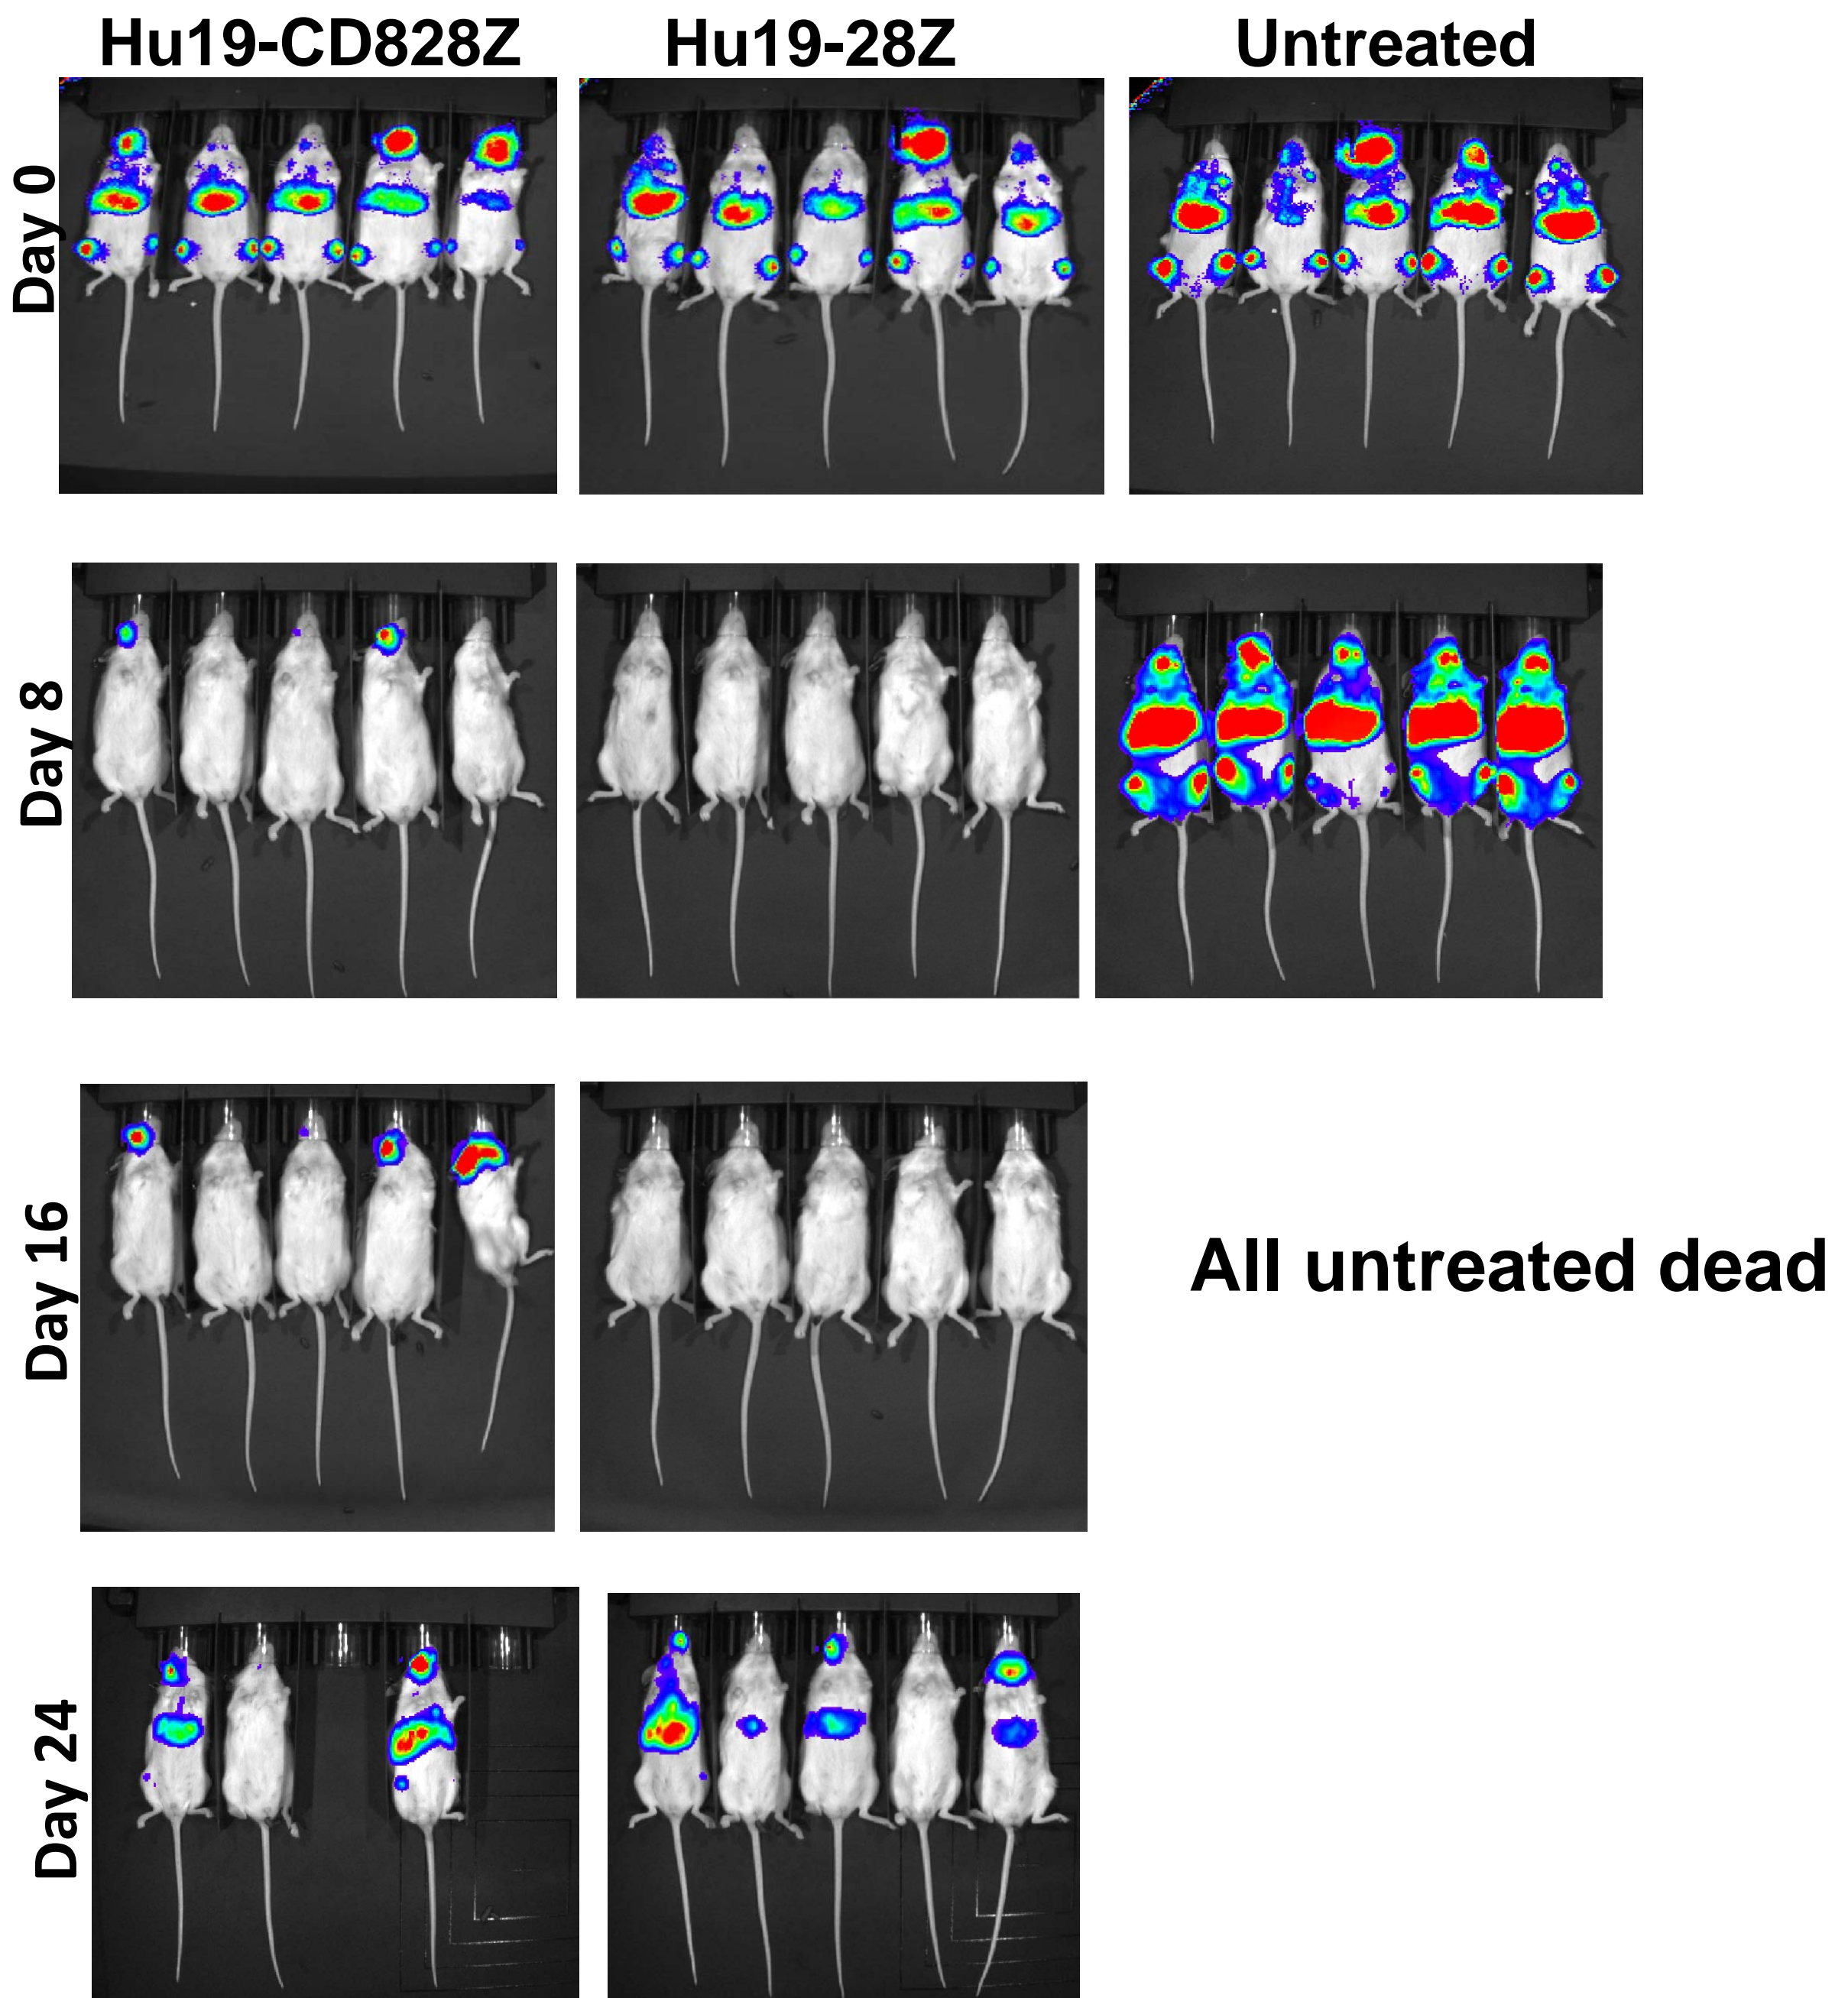

Bioluminescent images of mice bearing NALM6-GL. The groups were either left untreated or infused with  $4 \times 10^6$  T cells expressing either Hu19-CD828Z or Hu19-28Z. Images shown were captured on days 0, 8, 16, and 24 after CAR T-cell infusion. One of 2 experiments with very similar results is shown. Units are in photons/second/square centimeter/steradian  $\times 10^8$  at days 8, 16 and 24 and  $\times 10^6$  at day 0. Red is the color of most intense bioluminescence, and blue is the color of least intense bioluminescence.



## Supplemental Figure 9

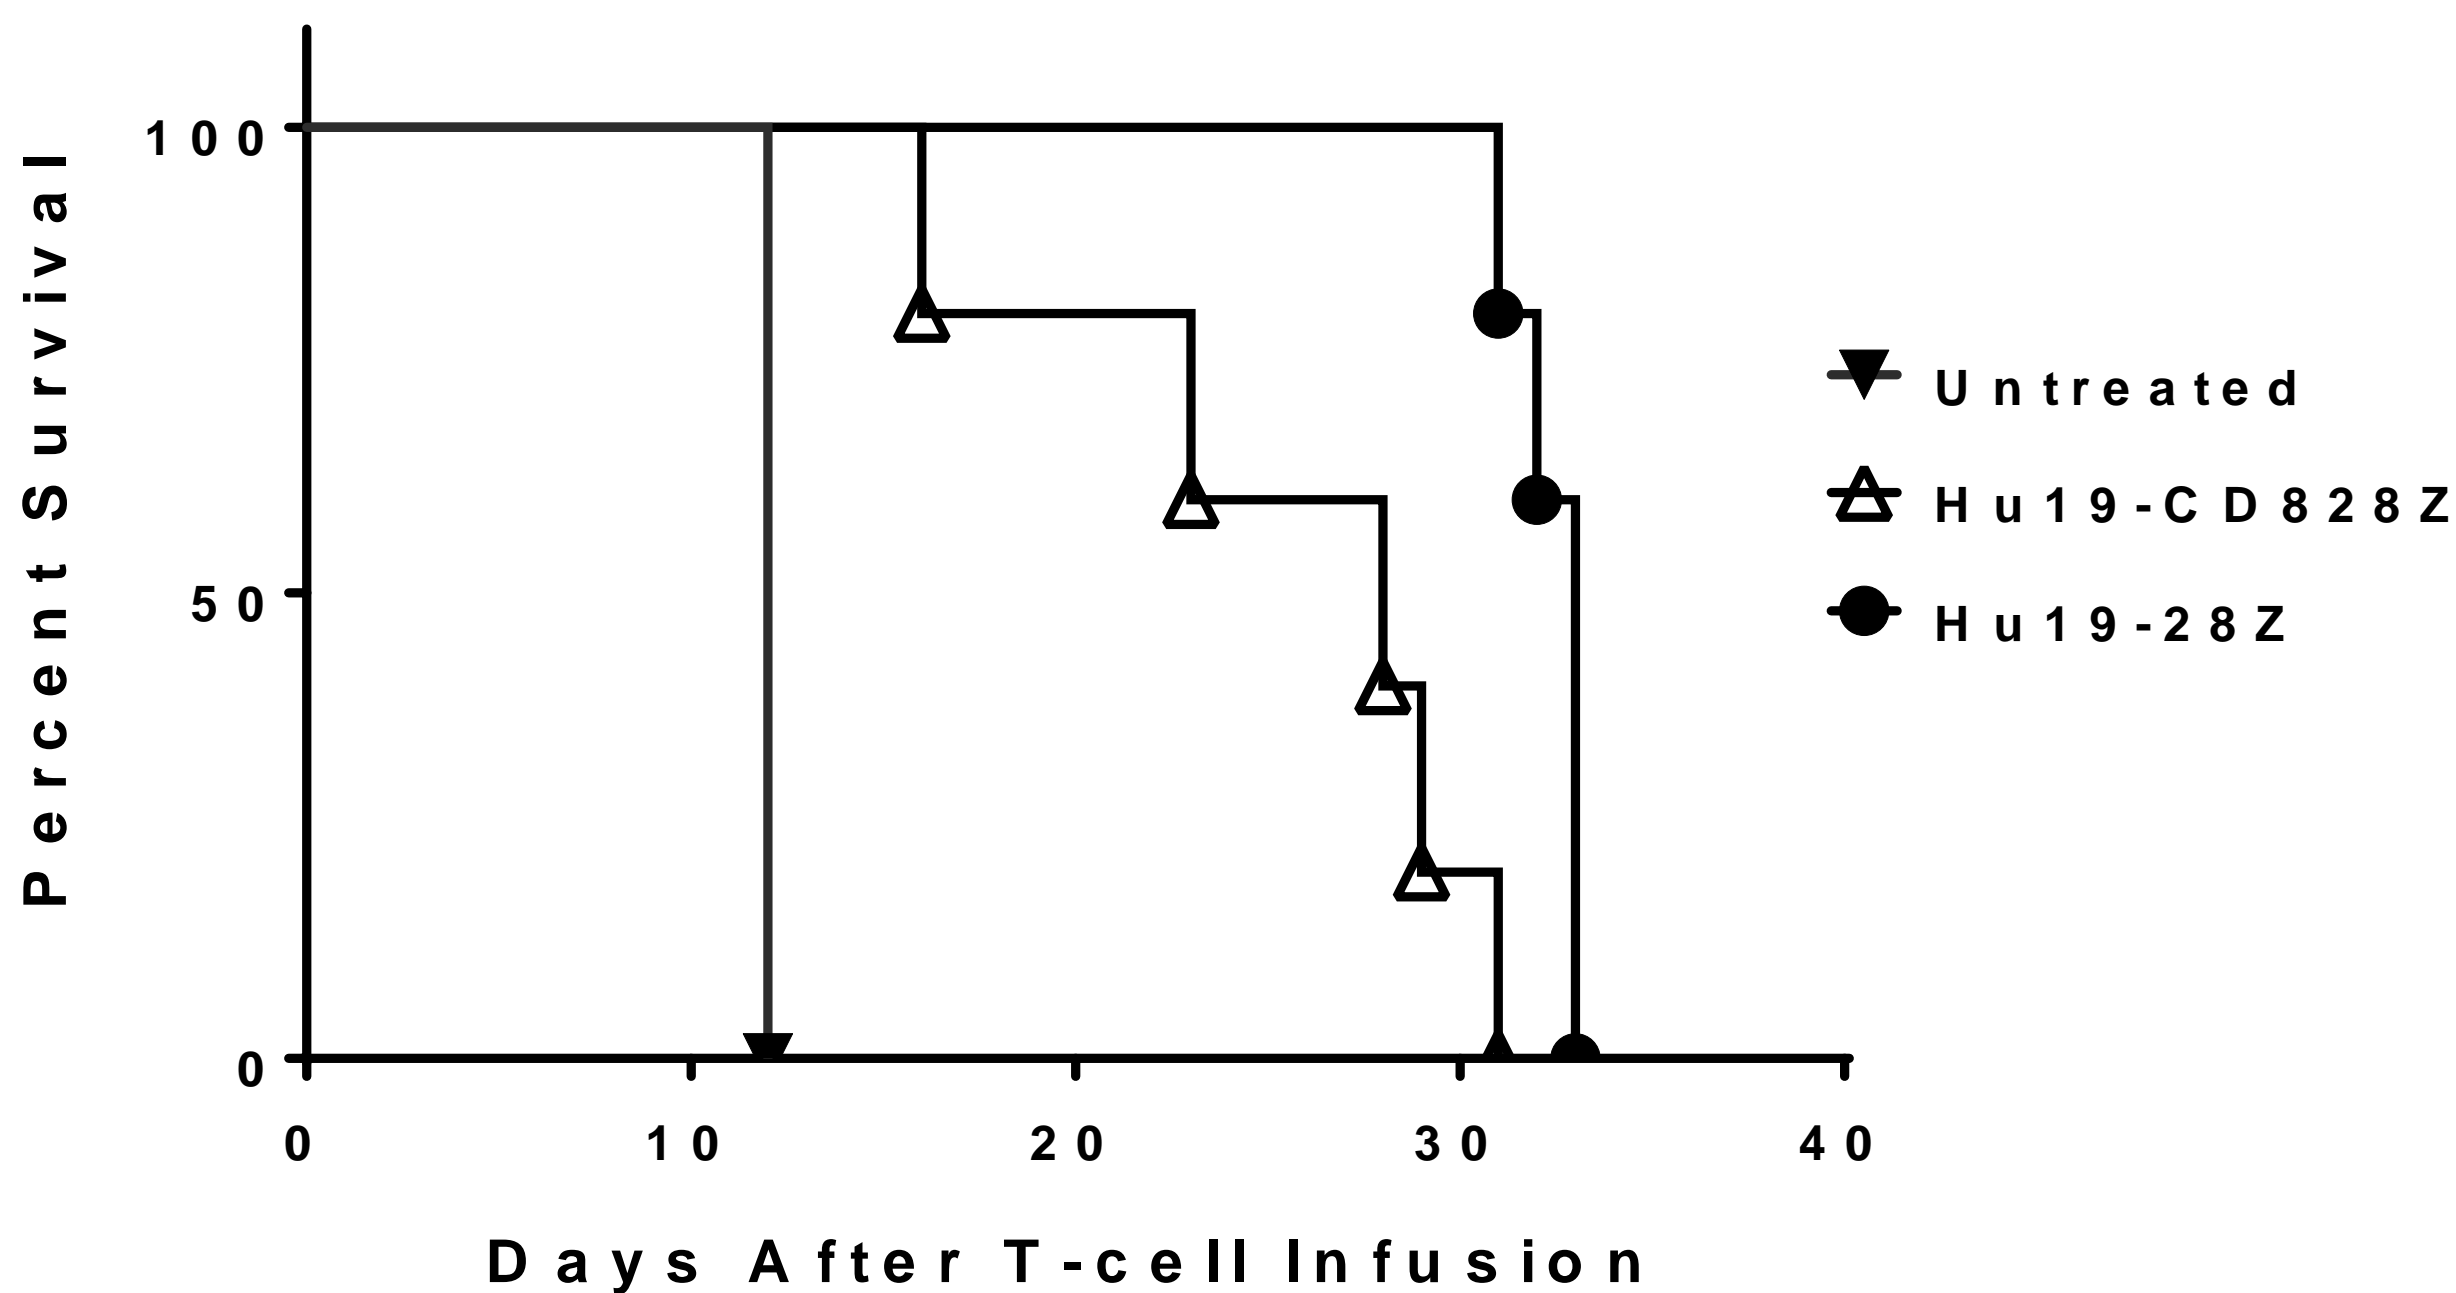

Survival of NALM6-GL bearing mice after treatment with Hu19-28Z or Hu19-CD828Z or no treatment (n = 5 mice for all groups).  $P = 0.0027$  for the comparison of Hu19-28Z vs. untreated;  $P = 0.0027$  for the comparison of Hu19-CD828Z vs. untreated;  $P = 0.0044$  for the comparison of Hu19-CD828Z vs. Hu19-28Z. Comparisons made by the log-rank test. Very similar results were obtained in 2 separate experiments with T cells from different donors.
